# Supplementary material for: Spousal Concordance in the Development of Functional Limitations Among Married Adults in China
Source: PubMed Central journal article supplement (PMC8479583; doi:10.1001/jamanetworkopen.2021.25577), 2021-09-28
Supplement: jamanetwopen-e2125577-s001.pdf [file jamanetwopen-e2125577-s001.pdf]

## Supplementary Online Content

Wang J, Wang Q, Hou XY, et al. Spousal concordance in the development of functional limitations among married adults in China. *JAMA Netw Open*. 2021;4(9):e2125577. doi:10.1001/jamanetworkopen.2021.25577

**eTable 1.** Comparison of Baseline Characteristics Between 5207 Couples With Complete Data and 6297 With Missing Data

**eTable 2.** Reciprocal Association in Functional Limitation (as Continuous Scores) Among Middle-aged and Older Couples, 2011-2018 (N = 5207 Couples)

**eFigure.** Reciprocal Association in Functional Limitation (as Continuous Scores) by Gender Among Different Age Groups, 2011-2018

This supplementary material has been provided by the authors to give readers additional information about their work.

**eTable 1.** Comparison of Baseline Characteristics Between 5207 Couples With Complete Data and 6297 With Missing Data

| Characteristics          | Husband (n, %)                            |                                             |                             | Wife (n, %)                               |                                             |                             |
|--------------------------|-------------------------------------------|---------------------------------------------|-----------------------------|-------------------------------------------|---------------------------------------------|-----------------------------|
|                          | Participants with complete data (n=5,207) | Participants with incomplete data (n=6,297) | <i>P</i> value <sup>a</sup> | Participants with complete data (n=5,207) | Participants with incomplete data (n=6,297) | <i>P</i> value <sup>a</sup> |
| <b>Age, year</b>         |                                           |                                             | .573                        |                                           |                                             | .266                        |
| 45-55                    | 1746 (33.53)                              | 2184 (34.71)                                |                             | 2153 (41.35)                              | 2717 (43.16)                                |                             |
| 55-65                    | 2146 (41.21)                              | 2570 (40.84)                                |                             | 2127 (40.85)                              | 2506 (39.81)                                |                             |
| 65-75                    | 1025 (19.69)                              | 1203 (19.12)                                |                             | 770 (14.79)                               | 892 (14.17)                                 |                             |
| ≥75                      | 290 (5.57)                                | 336 (5.34)                                  |                             | 157 (3.02)                                | 180 (2.86)                                  |                             |
| Missing                  | 0                                         | 4                                           |                             | 0                                         | 2                                           |                             |
| <b>Residence</b>         |                                           |                                             | .564                        |                                           |                                             | .781                        |
| Rural                    | 4019 (77.18)                              | 4881 (77.64)                                |                             | 4288 (82.35)                              | 5189 (82.55)                                |                             |
| Urban                    | 1188 (22.82)                              | 1406 (22.36)                                |                             | 919 (17.65)                               | 1097 (17.45)                                |                             |
| Missing                  | 0                                         | 10                                          |                             | 0                                         | 11                                          |                             |
| <b>Region</b>            |                                           |                                             | .904                        |                                           |                                             | .886                        |
| Eastern                  | 2010 (38.60)                              | 2455 (39.01)                                |                             | 2010 (38.60)                              | 2457 (39.05)                                |                             |
| Central                  | 1541 (29.59)                              | 1851 (29.41)                                |                             | 1541 (29.59)                              | 1850 (29.40)                                |                             |
| Western                  | 1656 (31.80)                              | 1987 (31.57)                                |                             | 1656 (31.80)                              | 1985 (31.55)                                |                             |
| Missing                  | 0                                         | 4                                           |                             | 0                                         | 5                                           |                             |
| <b>Occupation</b>        |                                           |                                             | .051                        |                                           |                                             | .318                        |
| Agricultural             | 3185 (61.17)                              | 3724 (59.38)                                |                             | 3008 (57.77)                              | 3564 (56.84)                                |                             |
| Non-                     | 2022 (38.83)                              | 2548 (40.63)                                |                             | 2199 (42.23)                              | 2706 (43.16)                                |                             |
| Missing                  | 0                                         | 25                                          |                             | 0                                         | 27                                          |                             |
| <b>Education</b>         |                                           |                                             | .998                        |                                           |                                             | .998                        |
| Illiterate               | 607 (11.66)                               | 734 (11.68)                                 |                             | 2009 (38.58)                              | 2411 (38.37)                                |                             |
| Literate                 | 926 (17.78)                               | 1116 (17.76)                                |                             | 954 (18.32)                               | 1158 (18.43)                                |                             |
| Primary                  | 1390 (26.69)                              | 1665 (26.50)                                |                             | 925 (17.76)                               | 1128 (17.95)                                |                             |
| Middle                   | 1406 (27.00)                              | 1713 (27.26)                                |                             | 865 (16.61)                               | 1043 (16.60)                                |                             |
| High and                 | 878 (16.86)                               | 1055 (16.79)                                |                             | 454 (8.72)                                | 544 (8.66)                                  |                             |
| Missing                  | 0                                         | 14                                          |                             | 0                                         | 13                                          |                             |
| <b>Household</b>         |                                           |                                             | .952                        |                                           |                                             | .952                        |
| Quartile                 | 1310 (25.16)                              | 1572 (25.19)                                |                             | 1310 (25.16)                              | 1572 (25.19)                                |                             |
| Quartile 2               | 1291 (24.79)                              | 1532 (24.55)                                |                             | 1291 (24.79)                              | 1532 (24.55)                                |                             |
| Quartile 3               | 1283 (24.64)                              | 1548 (24.80)                                |                             | 1283 (24.64)                              | 1548 (24.80)                                |                             |
| Quartile 4               | 1323 (25.41)                              | 1589 (25.46)                                |                             | 1323 (25.41)                              | 1589 (25.46)                                |                             |
| Missing                  | 0                                         | 56                                          |                             | 0                                         | 56                                          |                             |
| <b>Insurance</b>         |                                           |                                             | .917                        |                                           |                                             | .817                        |
| No                       | 264 (5.07)                                | 339 (5.42)                                  |                             | 285 (5.47)                                | 374 (5.98)                                  |                             |
| NRCMS                    | 3850 (73.94)                              | 4629 (73.95)                                |                             | 4114 (79.01)                              | 4932 (78.86)                                |                             |
| UEBMI                    | 637 (12.23)                               | 759 (12.12)                                 |                             | 419 (8.05)                                | 495 (7.91)                                  |                             |
| URBMI                    | 249 (4.78)                                | 296 (4.73)                                  |                             | 282 (5.42)                                | 330 (5.28)                                  |                             |
| Others                   | 207 (3.98)                                | 237 (3.79)                                  |                             | 107 (2.05)                                | 123 (1.97)                                  |                             |
| Missing                  | 0                                         | 37                                          |                             | 0                                         | 43                                          |                             |
| <b>Social activities</b> |                                           |                                             | .642                        |                                           |                                             | .547                        |
| No                       | 2545 (48.88)                              | 2762 (48.43)                                |                             | 2666 (51.20)                              | 3020 (50.63)                                |                             |
| Yes                      | 2662 (51.12)                              | 2941 (51.57)                                |                             | 2541 (48.80)                              | 2945 (49.37)                                |                             |
| Missing                  | 0                                         | 594                                         |                             | 0                                         | 332                                         |                             |

| eTable 1 (Continued)   |                            |                              |                      |                            |                              |                      |
|------------------------|----------------------------|------------------------------|----------------------|----------------------------|------------------------------|----------------------|
| Characteristics        | Husband (n, %)             |                              |                      | Wife (n, %)                |                              |                      |
|                        | Participants with complete | Participants with incomplete | P value <sup>a</sup> | Participants with complete | Participants with incomplete | P value <sup>a</sup> |
| <b>Smoking</b>         |                            |                              | .172                 |                            |                              | .594                 |
| Never                  | 1373 (26.37)               | 1632 (27.96)                 |                      | 4825 (92.66)               | 5829 (93.14)                 |                      |
| Current                | 3000 (57.61)               | 3289 (56.35)                 |                      | 297 (5.70)                 | 331 (5.29)                   |                      |
| Former                 | 834 (16.02)                | 916 (15.69)                  |                      | 85 (1.63)                  | 98 (1.57)                    |                      |
| Missing                | 0                          | 460                          |                      | 0                          | 39                           |                      |
| <b>Drinking</b>        |                            |                              | .818                 |                            |                              | .917                 |
| None                   | 2240 (43.02)               | 2683 (42.76)                 |                      | 4603 (88.40)               | 5538 (88.24)                 |                      |
| ≤once/month            | 561 (10.77)                | 699 (11.14)                  |                      | 246 (4.72)                 | 307 (4.89)                   |                      |
| >once/month            | 2406 (46.21)               | 2892 (46.09)                 |                      | 358 (6.88)                 | 431 (6.87)                   |                      |
| Missing                | 0                          | 23                           |                      | 0                          | 21                           |                      |
| <b>Self-rated</b>      |                            |                              | .747                 |                            |                              | .893                 |
| Good                   | 1374 (26.39)               | 1696 (27.00)                 |                      | 1054 (20.24)               | 1293 (20.59)                 |                      |
| Fair                   | 2548 (48.93)               | 3039 (48.38)                 |                      | 2438 (46.82)               | 2934 (46.72)                 |                      |
| Poor                   | 1285 (24.68)               | 1546 (24.61)                 |                      | 1715 (32.94)               | 2053 (32.69)                 |                      |
| Missing                | 0                          | 16                           |                      | 0                          | 17                           |                      |
| <b>Multimorbidity</b>  |                            |                              | .486                 |                            |                              | .672                 |
| 0                      | 1821 (34.97)               | 2265 (36.05)                 |                      | 1671 (32.09)               | 2059 (32.82)                 |                      |
| 1                      | 1671 (32.09)               | 1985 (31.59)                 |                      | 1615 (31.02)               | 1941 (30.94)                 |                      |
| ≥2                     | 1715 (32.94)               | 2033 (32.36)                 |                      | 1921 (36.89)               | 2274 (36.24)                 |                      |
| Missing                | 0                          | 14                           |                      | 0                          | 23                           |                      |
| <b>Functional</b>      |                            |                              | .452                 |                            |                              | .925                 |
| Yes                    | 1,140(21.89)               | 1,322 (21.31)                |                      | 1,502(28.85)               | 1,776 (28.77)                |                      |
| No                     | 4,067(78.11)               | 4,881 (78.69)                |                      | 3,705(71.15)               | 4,398 (71.23)                |                      |
| Missing                | 0                          | 94                           |                      | 0                          | 123                          |                      |
| <b>ADL limitation</b>  |                            |                              | .644                 |                            |                              | .695                 |
| Yes                    | 684(13.14)                 | 797 (12.84)                  |                      | 887(17.03)                 | 1,037 (16.76)                |                      |
| No                     | 4,523(86.86)               | 5,408 (87.16)                |                      | 4,320(82.97)               | 5,151 (83.24)                |                      |
| Missing                | 0                          | 92                           |                      | 0                          | 109                          |                      |
| <b>IADL limitation</b> |                            |                              | .201                 |                            |                              | .691                 |
| Yes                    | 834(16.02)                 | 967 (15.45)                  |                      | 1,183(22.72)               | 1,398 (22.41)                |                      |
| No                     | 4,373(83.98)               | 5,292 (84.55)                |                      | 4,024(77.28)               | 4,841 (77.59)                |                      |
| Missing                | 0                          | 38                           |                      | 0                          | 58                           |                      |

<sup>a</sup>: P values were obtained by chi-square tests. Abbreviations: UEBMI=Urban Employee Basic Medical Insurance, URBMI=Urban Resident Basic Medical Insurance, NRCMS=New Rural Cooperative Medical Scheme

**eTable 2.** Reciprocal Association in Functional Limitation (as Continuous Scores) Among Middle-aged and Older Couples, 2011-2018 (N = 5207 Couples)

| Outcomes                     | Model adjusting for gender <sup>e</sup> |         | Gender interaction models |         |                  |         |                                       |
|------------------------------|-----------------------------------------|---------|---------------------------|---------|------------------|---------|---------------------------------------|
|                              | Total                                   |         | Husband → Wife            |         | Wife → Husband   |         | P for gender interaction <sup>f</sup> |
|                              | β (95%CI)                               | P value | β (95%CI)                 | P value | β (95%CI)        | P value |                                       |
| <b>Functional limitation</b> |                                         |         |                           |         |                  |         |                                       |
| Model 1 <sup>a</sup>         | 0.13 (0.11-0.14)                        | <.001   | 0.13 (0.10-0.15)          | <.001   | 0.13 (0.11-0.15) | <.001   | .73                                   |
| Model 2 <sup>b</sup>         | 0.10 (0.09-0.12)                        | <.001   | 0.10 (0.08-0.12)          | <.001   | 0.11 (0.08-0.13) | <.001   | .75                                   |
| Model 3 <sup>c</sup>         | 0.10 (0.09-0.12)                        | <.001   | 0.10 (0.08-0.12)          | <.001   | 0.10 (0.08-0.13) | <.001   | .76                                   |
| Model 4 <sup>d</sup>         | 0.09 (0.08-0.11)                        | <.001   | 0.09 (0.07-0.11)          | <.001   | 0.10 (0.08-0.12) | <.001   | .74                                   |
| <b>ADL limitation</b>        |                                         |         |                           |         |                  |         |                                       |
| Model 1 <sup>a</sup>         | 0.10 (0.08-0.12)                        | <.001   | 0.10 (0.08-0.12)          | <.001   | 0.10 (0.08-0.13) | <.001   | .66                                   |
| Model 2 <sup>b</sup>         | 0.08 (0.07-0.10)                        | <.001   | 0.08 (0.06-0.10)          | <.001   | 0.09 (0.06-0.11) | <.001   | .64                                   |
| Model 3 <sup>c</sup>         | 0.08 (0.07-0.10)                        | <.001   | 0.08 (0.06-0.10)          | <.001   | 0.09 (0.06-0.11) | <.001   | .61                                   |
| Model 4 <sup>d</sup>         | 0.08 (0.06-0.09)                        | <.001   | 0.07 (0.05-0.09)          | <.001   | 0.08 (0.06-0.10) | <.001   | .55                                   |
| <b>IADL limitation</b>       |                                         |         |                           |         |                  |         |                                       |
| Model 1 <sup>a</sup>         | 0.12 (0.11-0.14)                        | <.001   | 0.13 (0.10-0.15)          | <.001   | 0.12 (0.10-0.14) | <.001   | .66                                   |
| Model 2 <sup>b</sup>         | 0.09 (0.08-0.11)                        | <.001   | 0.10 (0.08-0.12)          | <.001   | 0.09 (0.07-0.11) | <.001   | .70                                   |
| Model 3 <sup>c</sup>         | 0.09 (0.08-0.11)                        | <.001   | 0.10 (0.07-0.12)          | <.001   | 0.09 (0.07-0.11) | <.001   | .66                                   |
| Model 4 <sup>d</sup>         | 0.09 (0.07,0.10)                        | <.001   | 0.09 (0.07-0.11)          | <.001   | 0.09 (0.07-0.11) | <.001   | .65                                   |

<sup>a</sup>: Model 1 was not adjusted for any covariates; <sup>b</sup>: Model 2 was adjusted for covariates including individual's age, residence, region, occupation, education, income, and health insurance; <sup>c</sup>: Model 3 was adjusted for covariates including individual's age, residence, region, occupation, education, income, health insurance, social activities, smoking, and drinking; <sup>d</sup>: Model 4 was adjusted for covariates including individual's age, residence, region, occupation, education, income, health insurance, social activities, smoking, drinking, self-rated health, and multimorbidity; <sup>e</sup>: In models for the total sample here, gender was additionally added to the models as an adjustment variable (Models 1-4). <sup>f</sup>: P for gender interaction was examined using the gender-by-functional limitation (or ADL/IADL limitation) interaction test.  
Abbreviations: CI=confidence interval

(A) Among middle-aged couples: 45-59 years old

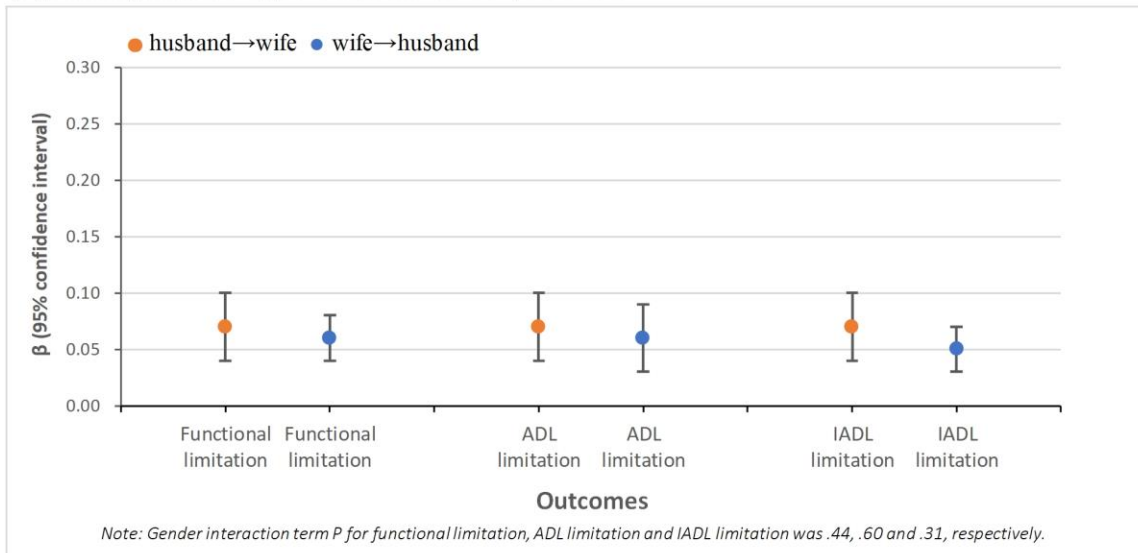

(B) Among older couples:  $\geq 60$  years old

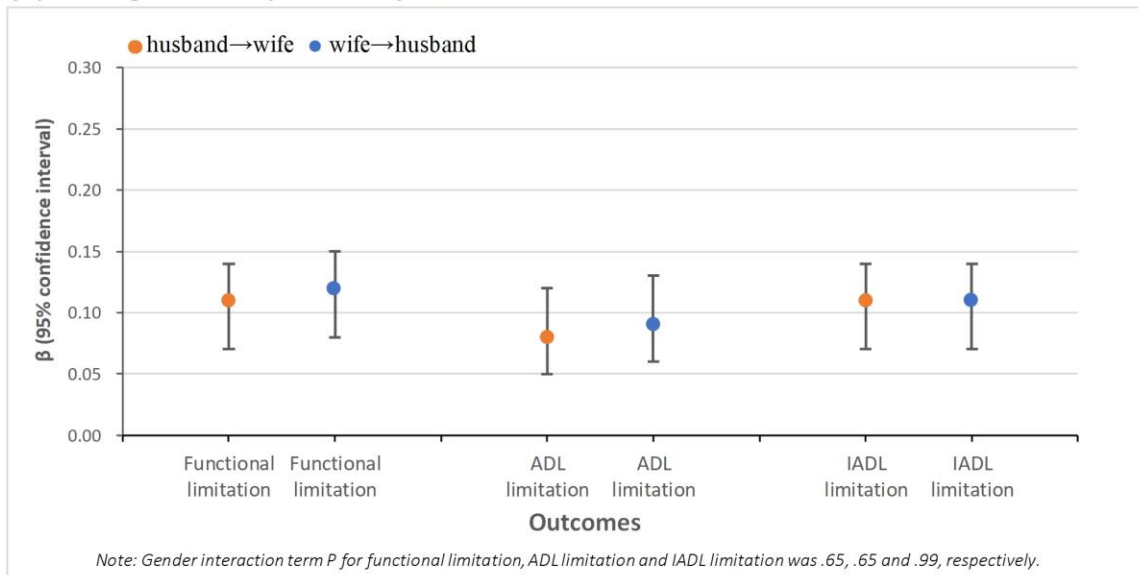

**eFigure 1.** Reciprocal Association in Functional Limitation (as Continuous Scores) by Gender Among Different Age Groups, 2011-2018

Note: All models were adjusted for individual's residence, region, occupation, education, income, health insurance, social activities, smoking, drinking, self-rated health and multimorbidity. Gender interaction term  $P$  was obtained using the gender-by-functional limitation (or ADL/IADL limitation) interaction test.
